# Supplementary material for: Theoretically proposed stable polymorph of two-dimensional pentagonal β-PdPSe
Source: Royal Society of Chemistry journal article supplement (doi:10.1039/d2cp04864g), 2023-01-01
Supplement: d2cp04864g1.pdf [file d2cp04864g1.pdf]

## Electronic Supplementary Information for

# “Theoretically proposed stable polymorph of two-dimensional pentagonal $\beta$ -PdPSe”

Klichchupong Dabsamut,<sup>a</sup> Intuon Chatratin,<sup>b</sup> Thanasee Thanasarnsurapong,<sup>a</sup> Tosapol Maluangnont,<sup>c</sup> and Adisak Boonchun,<sup>a\*</sup>

<sup>a</sup>Department of Physics, Faculty of Science, Kasetsart University, Bangkok 10900 Thailand

<sup>b</sup>Department of Materials Science and Engineering, University of Delaware, Newark, DE 19716, USA

<sup>c</sup>Electroceramics Research Laboratory, College of Materials Innovation and Technology, King Mongkut's Institute of Technology Ladkrabang, Bangkok 10520, Thailand

\*Email: Adisak.bo@ku

The coordinates and lattice parameters of the optimized geometries for  $\beta$ -PdPSe in the VASP-POSCAR format.

$\beta$ -PdPSe

1.0

|              |              |               |
|--------------|--------------|---------------|
| 5.8884139061 | 0.0000000000 | 0.0000000000  |
| 0.0000000000 | 5.8375825882 | 0.0000000000  |
| 0.0000000000 | 0.0000000000 | 20.0000000000 |

P Pd Se

4 4 4

Direct

|             |             |             |
|-------------|-------------|-------------|
| 0.396371722 | 0.115974844 | 0.513916910 |
| 0.896356881 | 0.364004582 | 0.513900876 |
| 0.396475226 | 0.116266422 | 0.627569735 |
| 0.896457851 | 0.364286005 | 0.627561331 |
| 0.028387094 | 0.997567654 | 0.493665248 |
| 0.528337240 | 0.482423574 | 0.493632823 |
| 0.028453387 | 0.997890830 | 0.647841871 |
| 0.528453052 | 0.482724309 | 0.647814691 |
| 0.142407417 | 0.604479432 | 0.462046593 |
| 0.642390966 | 0.875545144 | 0.462092340 |
| 0.142539009 | 0.604797065 | 0.679377556 |
| 0.642487407 | 0.875839829 | 0.679416537 |

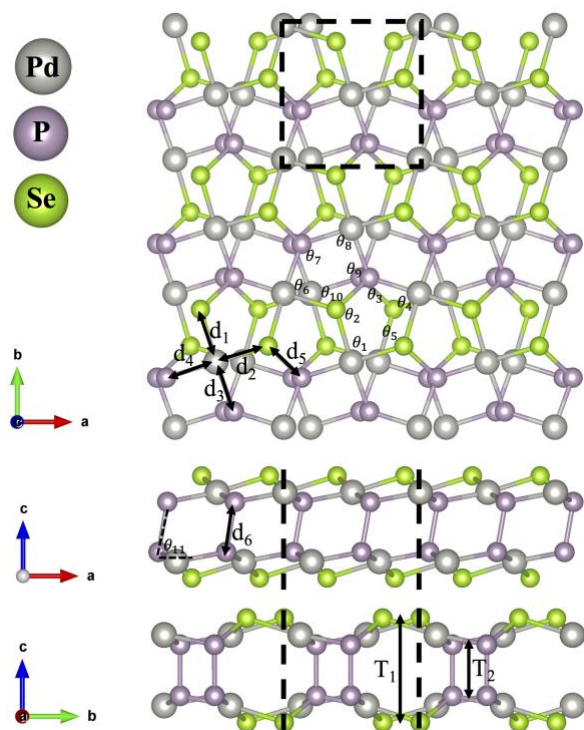

Fig. S1 3x3 supercell of pentagonal  $\alpha$ -PdPSe geometrical structures.

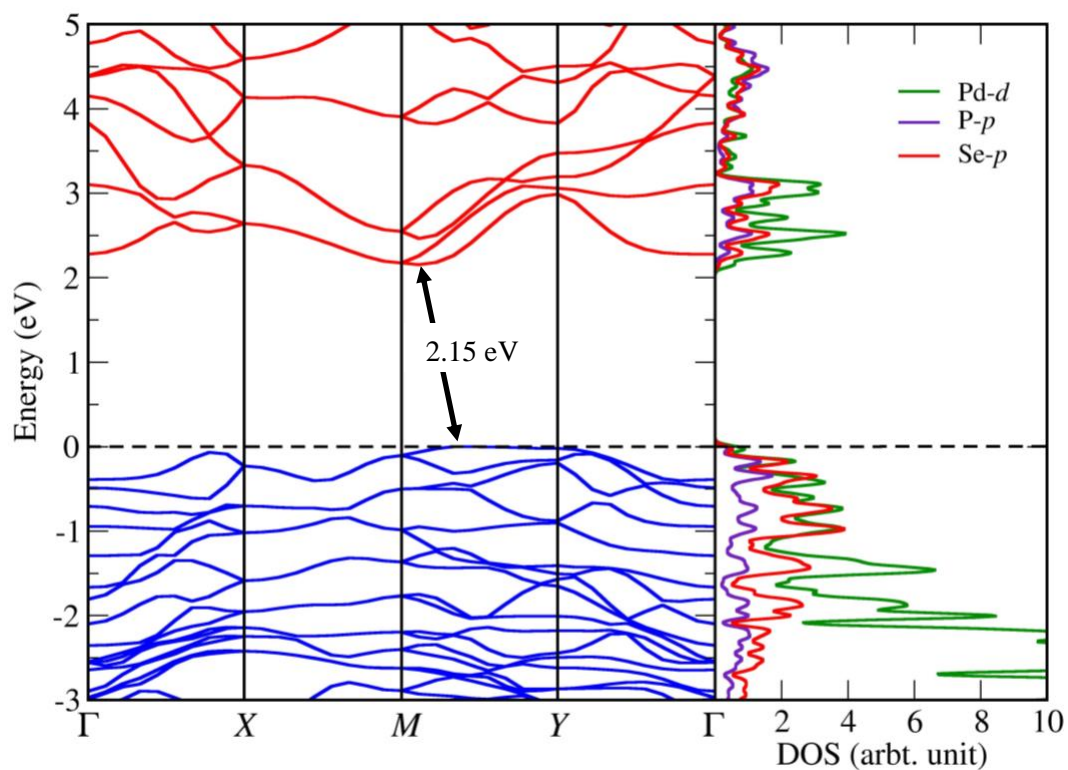

Fig. S2 Calculated band structure and partial density of state (PDOS) for pentagonal  $\alpha$ -PdPSe.

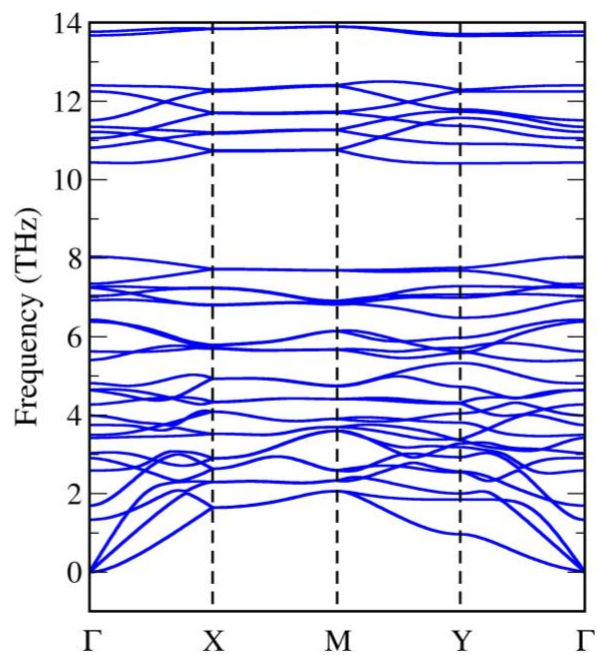

Fig. S3 Calculated phonon band structure of  $\alpha$ -PdPSe.

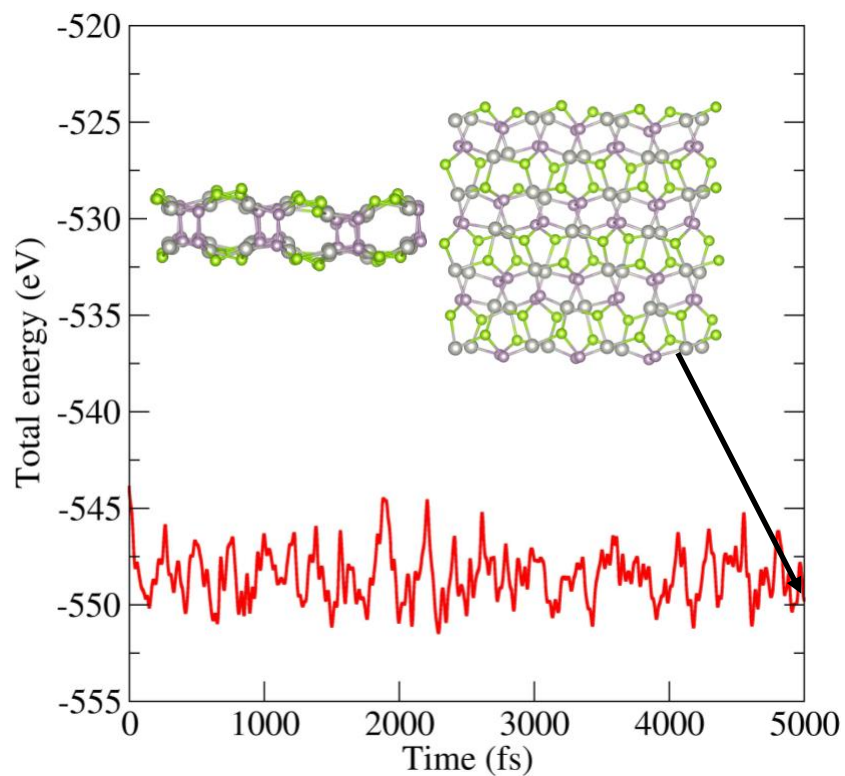

Fig. S4 Total energy fluctuation with time during the AIMD simulation at 1000 K of  $\alpha$ -PdPSe.

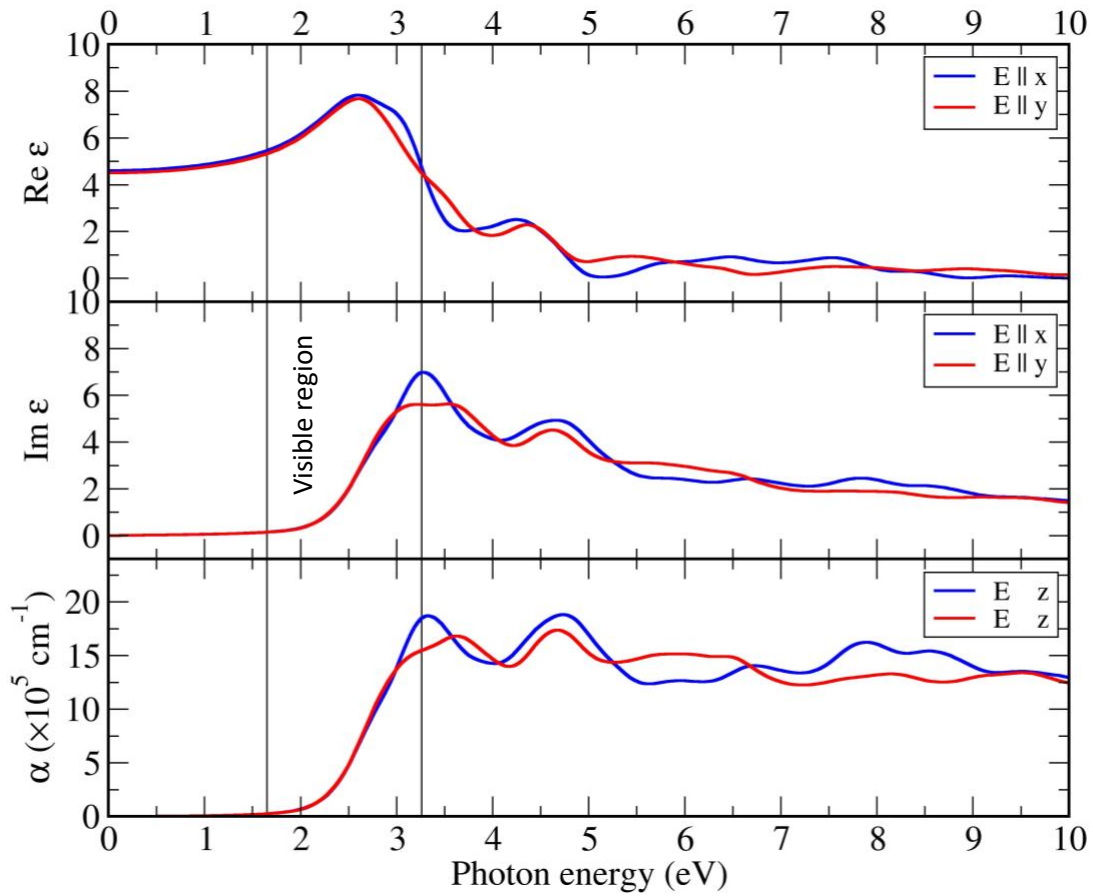

Fig. S5 Real part and Imaginary part of the dielectric function as a function of in-plane photon energy (x- and y-polarized light) for  $\alpha$  phase *penta*-PdPSe.
